1 **Full vaccination against COVID-19 suppresses SARS-CoV-2 delta variant and**  
2 **spike gene mutation frequencies and generates purifying selection pressure**

3

4 **Ting-Yu Yeh and Gregory P. Contreras**

5

6 Agricultural Biotechnology Laboratory, Auxergen Inc., Columbus Center, 701 E Pratt  
7 Street, Baltimore, MD 21202, USA

8

9 \*Ting-Yu Yeh is Corresponding author

10

11 E-mail: [yehty@auxergen.com](mailto:yehty@auxergen.com)

12 Tel: 1-443-762-1974

13

14

15 Key words: COVID-19, SARS-CoV-2, mutation frequency, neutrality tests,  
16 polymorphism, site-frequency spectrum

17 Short running title: Purifying selection of SARS-CoV-2 by vaccination

18 Word count: 2329 words (text)

19

20 This paper is dedicated to Professor Austin Hughes (1949-2015), an evolution  
21 biologist at University of South Carolina, for his lifetime achievement in neural  
22 theory and adaptive molecular evolution.

23

24

25 **Abstract**

26

27 COVID-19 vaccination resistance has become a major challenge to prevent global

28 SARS-CoV-2 transmission. Here we report that the vaccination coverage rate is

29 inversely correlated to the mutation frequency of the full genome ( $R^2=0.878$ ) and

30 spike gene ( $R^2=0.829$ ) of SARS-CoV-2 delta variants in 16 countries, suggesting that

31 full vaccination against COVID-19, with other mitigation strategies, is critical to

32 suppress emergent mutations. Neutrality analysis of  $DH$  and Zeng's  $E$  tests

33 suggested that directional selection was the major driving force of delta variant

34 evolution. To eliminate the homogenous effects (population expansion, selective

35 sweep etc.), the synonymous ( $D_{syn}$ ) and nonsynonymous ( $D_{nonsyn}$ ) polymorphisms of

36 the delta variant spike gene were estimated with Tajima's  $D$  statistic. Both  $D$  ratio

37 ( $D_{nonsyn}/D_{syn}$ ) and  $\Delta D$  ( $D_{syn}-D_{nonsyn}$ ) have positive correlation with the full vaccination

38 rate ( $R^2= 0.723$  and  $0.505$ , respectively) in 19 countries, indicating that purifying

39 selection pressure of SARS-CoV-2 spike gene increased as the vaccination coverage

40 rate increased. Taken together, our data suggests that vaccination plays an

41 important role in the purifying selection force of spike protein of SARS-CoV-2 delta

42 variants.

43

44

## 45 **Introduction**

46 Legally required vaccination against various infectious diseases is essential to public  
47 health policy in many countries. However, resistance to voluntary COVID-19  
48 vaccination has emerged worldwide, including in the United States. In mid-June  
49 2021, 33% of Americans said they were not willing to be vaccinated (Kirzinger et al,  
50 2021). Public distrust has undermined COVID-19 vaccine acceptance, in association  
51 with a belief that the vaccine is ineffective, dangerous or compromises individual  
52 freedom (Schmelz et al, 2021). Therefore, overcoming COVID-19 vaccination  
53 resistance has become a major challenge to prevent global SARS-CoV-2  
54 transmission.

55

56 Mutations drive genome variability, generating many different SARS-CoV-2 variants  
57 as the virus evolves to escape vaccine-mediated immunity and thereby, develop  
58 drug or vaccine resistance (Roy et al., 2020). The delta (lineage B.1.617.2) variants  
59 were first documented in October 2020 in India and were designated variants of  
60 concern by the World Health Organization in May of 2021 due to its increased  
61 transmissibility and virulence ([https://www.who.int/en/activities/tracking-SARS-  
62 CoV-2-variants/](https://www.who.int/en/activities/tracking-SARS-CoV-2-variants/)). All SARS-CoV-2 mutations result from two major mechanisms: (1)  
63 spontaneous substitution/deletion of nucleotides, and (2) RNA recombination (Roy  
64 et al, 2020, Yeh and Contreras, 2020, Ignatieva et al, 2021, Yeh and Contreras, 2021).  
65 Until now, it remained unclear exactly how human vaccinations affected virus  
66 selective pressure.

67

68

69 **Is there correlation between mutation frequency and vaccination?**

70 To explore this question, we first analyzed the correlation between the rates of full  
71 vaccination and the point mutation frequency ( $Mf$ ) of COVID-19 delta variants'  
72 genome in 20 countries. Complete SARS-CoV-2 genome sequences with high  
73 coverage from June 20 to July 3 2021 in 20 countries: Australia ( $N=121$ ), France  
74 ( $N=788$ ), Germany ( $N=955$ ), Indonesia ( $N=97$ ), India ( $N=171$ ), Ireland ( $N=617$ ),  
75 Israel ( $N=333$ ), Italy ( $N=642$ ), Japan ( $N=105$ ), Mexico ( $N=368$ ), Netherland ( $N=456$ ),  
76 Norway ( $N=142$ ), Portugal ( $N=782$ ), Singapore ( $N=131$ ), Spain ( $N=689$ ),  
77 Switzerland ( $N=131$ ), Sweden ( $N=786$ ), Turkey ( $N=428$ ), United States ( $N=537$ ), and  
78 United Kingdom (UK,  $N=3534$ ) were collected from the Global Initiative on Sharing  
79 All Influenza Data (GISAID) (<https://www.gisaid.org/>).  $Mf$  was calculated as  $Pi / (Ln$   
80  $\times Ns)$ .  $Pi$  is the number of instances of polymorphism detected within the  
81 genome/locus.  $Ln$  is the nucleotide length of the genome/locus.  $Ns$  is the number of  
82 sequenced entities present in the dataset (Roy et al., 2020). The information of fully  
83 vaccinated rate on 3 July 2021 in individual counties were obtained in Our World in  
84 Data (<https://ourworldindata.org/covid-vaccinations>).

85

86 We found that  $Mf$  was logarithmically reduced as the full vaccination rate increased  
87 in 16 of 20 countries ( $R^2=0.878$ ,  $P<10^{-7}$ , Figure 1A). To our knowledge, this is the  
88 first evidence suggesting that vaccinations could successfully suppress viral  
89 mutations. Since the spike protein is the target of the vaccination program, we  
90 further examined mutations of delta variant spike gene. Likewise, we found that

91 the  $M_f$  of the spike gene was also logarithmically reduced as the full vaccination rate  
92 increased this time in 17 of the 20 countries ( $R^2=0.829$ ,  $P<10^{-6}$ , Figure 1B). With a  
93 10.8% vaccinated rate,  $M_f$  was exceptionally low in Australia, likely as a result of the  
94 strict state lockdown restrictions. In contrast, the  $M_f$ s are higher in Japan,  
95 Switzerland, and United States, suggesting that their social mitigation strategies  
96 have been less successful. This also suggests that the mutation frequency may be not  
97 only affected by vaccination only, but may also reflect overall control of the virus.

98

### 99 **How does vaccination affect selection pressure?**

100 SARS-CoV-2 is subject to many powerful selection pressures which may contribute  
101 to vaccine escape. Like other viruses, the delta variant appears to have been selected  
102 for its increased transmissibility regardless of vaccination. Previously we reported  
103 on the mutations and selection pressure of SARS-CoV-2 among passengers in close-  
104 quarters quarantine on the Diamond Princess cruise ship between January and  
105 March 2020 (Yeh and Contreras, 2021). Until then, it had been unclear whether  
106 COVID-19 variants were evolving randomly or under selection pressures generated  
107 by vaccination and/or other mitigation efforts.

108

109 To understand how selection pressure operates within COVID-19 virus populations,  
110 we analyzed the polymorphism of the full SARS-CoV-2 genome using neutrality tests  
111 based on the site-frequency spectrum: (1) Tajima's  $D$  test, (2) normalized Wu and  
112 Fay's  $DH$  test, and (3) Zeng's  $E$  test, using DNASP6 software with the bat coronavirus  
113 RaTG13 as the outgroup sequence (Rozas, et al., 2017). The Tajima  $D$  test compares

114 pairwise nucleotide diversity ( $\pi$ , the average number of nucleotide differences per  
115 site between two sequences) and total polymorphism to infer selection and/or  
116 demographic events (Tajima, 1989). *DH* test is sensitive to the changes in high-  
117 frequency variants and primarily affected by directional selection and no other  
118 driving forces, such as demographic expansion (Zeng et al., 2006). Zeng's *E* test  
119 contrasts high and low frequency regions of frequency spectrum, so this test can  
120 detect population growth after a sweep (Zeng et al., 2006). Statistical significance of  
121 observed values of all tests was obtained by coalescent simulation with free  
122 recombination after 10,000 replicates. The probability for each test statistic was  
123 calculated as the frequency of replicates with a value lower than the observed  
124 statistic (two-tailed test) by DNASP6 (Rozas, et al., 2017).

125

126 We observed that Tajima's *D* values were negative and significantly deviated from  
127 zero (-2.199 to -2.878,  $P < 0.05$ ) among 19 countries, indicating an excess of variants  
128 of low frequency (Table 1). Because the negative Tajima's *D* values could result from  
129 demographic expansion and/or purifying/positive selection, we further employed  
130 normalized *DH* (insensitive to population growth) and Zeng's *E* test (Zeng et al.,  
131 2006). Because fixation causes quick loss of high-frequency alleles by drift, and  
132 excess of low-frequency mutations are generated, Zeng's *E* test is very sensitive to  
133 population growth. Genomic polymorphism of these viral populations revealed  
134 significantly negative *DH* values (-1.177 to -2.791,  $P < 0.05$ ), but *E* values were not  
135 significantly different from zero (-0.04 to 0.482,  $P > 0.05$ ) (Table 1). Similar results  
136 were obtained after confining our analysis to the spike gene of SARS-CoV-2 delta

137 variants using Tajima'  $D$ ,  $DH$ , and Zeng's  $E$  tests (Table 1). Taken together, these data  
138 suggest that directional selection was operating in these countries, and  
139 demographic expansion was less likely the major driving force.

140

141 Selection pressure has been observed in unvaccinated SARS-CoV-2 populations,  
142 such as in the aforementioned Diamond Princess shipboard lockdown (Yeh and  
143 Contreras, 2021). Our current results lead to the hypothesis that vaccination could  
144 contribute to a part of the selection pressures on SARS-CoV-2, especially on the  
145 spike protein. It has been shown that, within populations, the frequency distribution  
146 of non-synonymous polymorphisms is negatively skewed relative to the distribution  
147 of synonymous polymorphisms under purifying selection (Hahn et al, 2002; Hughes,  
148 et al. 2005). Therefore, this hypothesis can be examined using a modified Tajima's  $D$   
149 statistics, which takes more negative values for non-synonymous ( $D_{\text{non-syn}}$ ) than for  
150 synonymous sites ( $D_{\text{syn}}$ ) of spike gene under purifying selection (Hahn et al, 2002,  
151 Hughes, et al., 2005). The average number of pairwise synonymous differences ( $kS$ )  
152 and the average number of nonsynonymous pairwise differences ( $kN$ ), the number  
153 of synonymous segregating sites ( $S_S$ ), and the number of nonsynonymous  
154 segregating sites ( $S_N$ ) were computed with equation as Austin Hughes described (1)

155  $S^*_S = S_S/a_1$ , (2)  $S^*_N = S_N/a_1$ , where  $a_1$  is as  $a_1 = \sum_{i=1}^{n-1} \frac{1}{i}$  (Tajima, 1989, Hughes, et al.,  
156 2005).  $D_{\text{syn}}$  was defined as  $kS - S^*_S$ , divided by the standard error of that difference,  
157 and  $D_{\text{non-syn}}$  was defined as  $kN - S^*_N$ , divided by the standard error of that difference  
158 (Tajima, 1989, Hughes, et al., 2005). The values of  $K_a/K_s$  (the ratio of the number of  
159 nonsynonymous substitutions per non-synonymous site ( $K_a$ ), to the number of

160 synonymous substitutions per synonymous site ( $K_s$ ), in a given period of time), and  
161 the neutrality index of the McDonald-Kreitman (MK) test of the spike protein  
162 (RaTG13 as the outgroup sequence) were analyzed by DNASP6 software (Rozas, et  
163 al., 2017).

164

165 Unlike Tajima's  $D$  test, it has been demonstrated that  $D_{\text{nonsyn}}$  and  $D_{\text{syn}}$  analysis is  
166 independent of sample size, so the value of  $D_{\text{nonsyn}}$  or  $D_{\text{syn}}$  can be compared between  
167 data sets of different sizes (Hughes et al., 2008). The same excess of low-frequency  
168 alleles in non-synonymous polymorphism was also observed ( $D_{\text{nonsyn}} = -1.482$  to  
169  $-2.714$ ;  $P < 0.01$ ). In addition, the  $K_a/K_s$  values were less than 1 and the neutrality  
170 index values of the MK test were significantly more than 1 ( $P < 0.05$ ) in all countries  
171 (Table 1). These results confirmed that purifying selection led to constraint on the  
172 available neutral mutations at non-synonymous sites of the spike gene of delta  
173 variants, consistent to previous reports of SARS-CoV-2 variants in 2020 (Chaw et al,  
174 2020).

175

176 Because non-synonymous and synonymous mutations are affected unequally by  
177 purifying selection,  $D_{\text{nonsyn}}$  is expected to be disproportionately lower than  $D_{\text{syn}}$  (Hahn  
178 et al., 2002). It has been proposed that the value of  $\Delta D$  ( $D_{\text{syn}} - D_{\text{nonsyn}}$ ) increased as  
179 purifying selection became stronger, and  $\Delta D$  ( $D_{\text{syn}} - D_{\text{nonsyn}}$ ) is also able to rule out the  
180 homogenous effects (population expansion, selective sweep etc.) in neutrality tests  
181 (Hahn et al, 2002). We observed that  $\Delta D$  of the spike gene of SARS-CoV-2 delta  
182 variants is positively proportional to fully vaccination coverage rate ( $R^2 = 0.505$ ,



183  $P=0.001$ ). When using  $D$  ratio ( $D_{\text{nonsyn}}/D_{\text{syn}}$ ), the standard error terms in both  
184 equations of  $D_{\text{nonsyn}}$  and  $D_{\text{syn}}$  cancel out the sample size effect (Hughes, 2008). The  
185 positive correlation of  $D$  ratio and fully vaccination rate became even more evident  
186 ( $R^2= 0.723, P<10^{-4}$ ) (Figure 2). Therefore, purifying selection pressure of SARS-CoV-  
187 2 spike gene increased as the vaccination coverage rate increased. This suggests that  
188 vaccination, in combination with other mitigation strategies, plays an important role  
189 in the purifying selection force of SARS-CoV-2 spike protein.

190

### 191 **Application of neutrality tests and their limitations**

192 Neutrality tests are very powerful tools to study population genetics and viral  
193 evolution. However, these tests require careful interpretation due to two known  
194 limitations in this study: (1) sampling across countries and the representation of  
195 sequences in public databases, (2) the timing of introductions and vaccination  
196 campaigns. Previously we have applied various neutrality tests to analyze SARS-  
197 CoV-2 transmission and evolution in Diamond Princess cruise (Yeh and Contreras,  
198 2021). In contrast to the shipboard quarantine, where the virus spread in a closed  
199 environment, many more complicated factors (mitigation efforts, travel, herd  
200 immunity, etc.) could influence viral evolution during pandemics among different  
201 countries.

202

203 Bhatt et al. have shown that the Tajima  $D$  test performs very well with low type I  
204 error rate (less than 5%) when the  $\theta$  value (the substitutions per site of a sequence  
205 alignment) is between 0.1 to  $10^{-4}$  in different RNA viruses (Bhatt et al., 2010).

206 Because  $\theta$  values in this study ranged between 0.0009 to 0.032, the type I error rate  
207 is low. The Tajima  $D$  test is also much less influenced by RNA recombination, which  
208 we have reported previously (Yeh and Contreras, 2020, Yeh and Contreras, 2021).  
209 Tajima  $D$  test results depend on the interplay of many parameters: positive and  
210 negative selection, population size dynamics, spatial structure and migration,  
211 random genetic drift, etc. A key limitation of the Tajima  $D$  test is the difficulty to  
212 separate the effects of each parameter. However, the selection pressure and  
213 demographic expansion can be verified in combination with other neutrality tests.  
214 Our results of  $DH$  and Zeng's  $E$  test suggests that purifying selection, not  
215 demographic expansion, was the acting force. Tajima  $D$  may show negative values  
216 due to a recent bottleneck event rather than selection, but the bottleneck effect  
217 should impact all types of polymorphism equally (Tajima, 1989). Significant  
218 differences between  $D_{\text{nonsyn}}$  and  $D_{\text{syn}}$  (either  $\Delta D$  or  $D$  ratio ( $D_{\text{nonsyn}}/D_{\text{syn}}$ )), which  
219 efficiently eliminated the homogenous effects, strongly indicates that purifying  
220 selection was at play and is positively correlated with vaccination coverage rate  
221 within these samples.

222

223 The inter-species divergence  $K_a/K_s$  test has been shown to be poorly equipped to  
224 detect positive selection in short time scales for the comparison of young  
225 evolutionary lineages like SARS-CoV-2 (Mugal, et al., 2014). Consistent with other  
226 analytical attempts, our  $K_a/K_s$  data was inconclusive (Table 1). This has been the  
227 case with other applications of the  $K_a/K_s$  test in SARS-CoV-2 spike gene, which  
228 resulted in extreme values and controversial results (Kang et al., 2021),

229

230 In contrast to  $K_a/K_s$ , the MK test cannot be used to locate specific sites under  
231 selection, although this test enables us to estimate the adaptive substitution rate of a  
232 gene (Smith and Eyre-Walker, 2002). Variants of the MK test have been used to  
233 analyze the evolution of RNA viruses (Bhatt et al., 2010). Since the MK test relies on  
234 the comparison of the ratio of polymorphism to fixed differences of both  
235 synonymous and nonsynonymous mutations, selection of an outgroup sequence is  
236 critical for this test. The number of fixed synonymous mutations may be  
237 underestimated in a rapidly evolving virus like SARS-CoV-2 when a distant outgroup  
238 is applied (Baudry and Depaulis, 2003). Since the  $K_a/K_s$  or the MK tests may not be  
239 the appropriate tests for SARS-CoV-2 delta variants, we only included them to  
240 confirm the observation of purifying selection of SARS-CoV-2 spike gene here as  
241 well. We also did not include neutrality tests based on haplotype distribution or  
242 linkage disequilibrium, because they are expected to be strongly affected by RNA  
243 recombination that commonly occurred in SARS-CoV-2 populations (Yeh and  
244 Contreras, 2020, Ignatieva et al, 2021, Yeh and Contreras, 2021).

245

## 246 **Perspectives**

247 More virulent strains of SARS-CoV-2 have emerged with enhanced transmissibility  
248 and immune evasion properties. For example, multiple variants have escaped  
249 neutralizing antibodies developed to target the spike protein receptor-binding or N-  
250 terminal domain (Harvey, et al., 2021). What's more, the case numbers of

251 breakthrough infection caused by the delta variant have increased drastically  
252 worldwide (Farinholt et al., 2021).  
253  
254 Of all countries studied, our observations show that higher vaccination rates  
255 corresponded with lower mutation frequencies and higher  $D_{\text{nonsyn}}/D_{\text{syn}}$  values for  
256 the whole genome and the spike gene. We conclude then, that as the vaccination  
257 coverage rate increases, purifying selection forces of nonsynonymous mutations  
258 also increase.  
259  
260 Thus, we recommend that: 1) universal vaccination should be administered as soon  
261 as possible to suppress the generation of deadly mutations; 2) mitigations strategies  
262 such as personal protection equipment, social distancing, etc., should be continued  
263 until full vaccination is reached to prevent viral transmission; 3) genomic  
264 surveillance should be undertaken to monitor for new mutations; and 4) more  
265 sequence summary statistics of RNA virus evolution are required to facilitate  
266 understanding new COVID-19 outbreaks.  
267  
268  
269

270 **Disclosure statement**

271 No potential conflict of interest was reported by the author(s).

272

273 **Author contributions**

274 All authors contributed to study concept, rationale, and initial manuscript drafts,  
275 interpretation of data, and final manuscript preparation. All authors have read and  
276 approved the final version of the manuscript.

277

278 **Funding**

279 No funding

280

281 **Ethical approval**

282 None declared.

283

284 **References**

285

286 Bhatt, B., Katzourakis, A., Pybus, O.G., (2010) Detecting natural selection in RNA

287 virus populations using sequence summary statistics. *Infect Genet Evol.*, *10*, 421-30.

288 Baudry, E., Depaulis, F. (2003) Effect of misoriented sites on neutrality tests with

289 outgroup. *Genetics*, *165*, 1619-1622

290 Chaw, S.M., Tai, J.H., Chen, S.L., Hsieh, C.H., Chang, S.Y., Yeh, S.H., Yang, W.S., Chen, P.J.,

291 Wang, H.Y. (2020) The origin and underlying driving forces of the SARS-CoV-2

292 outbreak. *J Biomed Sci.*, *27*, 73.

293 Farinholt, T., Doddapaneni, H., Qin, X., Menon, V., Meng, Q., Metcalf, G., Chao, H.,

294 Gingras M., Farinholt, P., Agrawal, C., Muzny, D.M., Piedra, P.A., Gibbs, R.A.,

295 Petrosino, J. (2021) Transmission event of SARS-CoV-2 Delta variant reveals

296 multiple vaccine breakthrough infections. medRxiv doi:  
297 [10.1101/2021.06.28.21258780](https://doi.org/10.1101/2021.06.28.21258780).

298 Harvey, W.T., Carabelli, A.M., Jackson, B., Gupta, R.K., Thomson, E.C., Harrison, E.M.,  
299 Ludden, C., Reeve, R., Rambaut, A., COVID-19 Genomics UK (COG-UK) Consortium,  
300 Peacock S.H., Robertson D.L. (2021) SARS-CoV-2 variants, spike mutations and  
301 immune escape. *Nat Rev Microbiol.* ,19, 409-424.

302 Hahn, M.W., Rausher, M.D., Cunningham, C.W. (2002) Distinguishing between  
303 selection and population expansion in an experimental lineage of bacteriophage T7.  
304 *Genetics*, 161, 11-20.

305 Hughes, A.L., (2005) Evidence for Abundant Slightly Deleterious Polymorphisms in  
306 Bacterial Populations. *Genetics*, 169, 533-538.

307 Hughes, A.L., Friedman, R., Rivaller, P., French, J.O., (2008) Synonymous and  
308 nonsynonymous polymorphisms versus divergences in bacterial genomes. *Mol Biol*  
309 *Evol.* ,25, 2199–2209.

310 Ignatieva, A., Hein, J., Jenkins, P.A, (2021) Evidence of ongoing recombination in  
311 SARS-CoV-2 through genealogical reconstruction. bioRxiv,  
312 <https://doi.org/10.1101/2021.01.21.427579>

313 Kang, L., He, G., Sharp, A.K., Wang, X., Brown, A.M., Michalak. P., Weger-Lucarelli, J.  
314 (2021) A selective sweep in the Spike gene has driven SARS-CoV-2 human  
315 adaptation. *Cell*, 184, 4392-4400.

316 Kirzinger, A., Sparks, G., Brodie, M. (2021) KFF COVID-19 vaccine monitor-Rural  
317 America. [https://www.kff.org/coronavirus-covid-19/poll-finding/kff-covid-19-](https://www.kff.org/coronavirus-covid-19/poll-finding/kff-covid-19-vaccine-monitor-in-their-own-words-six-months-later/)  
318 [vaccine-monitor-in-their-own-words-six-months-later/](https://www.kff.org/coronavirus-covid-19/poll-finding/kff-covid-19-vaccine-monitor-in-their-own-words-six-months-later/) Accessed 13 July 2021.

319 Mugal, C.F., Wolf, J.B., Kaj, I. (2013) Why time matters: codon evolution and the  
320 temporal dynamics of dN/dS. *Mol Biol Evol.*, *31*,212–231.

321 Rozas, J., Ferrer-Mata, A., Sánchez-DelBarrio, J.C., Guirao-Rico, S., Librado, P., Ramos-  
322 Onsins, S.E., Sánchez-Gracia, A. (2017) DnaSP 6: DNA Sequence Polymorphism  
323 Analysis of Large Data Sets. *Mol Biol Evol.*, *34*, 3299–3302.

324 Roy, C., Mandal, S.M., Mondal, S.K., Mukherjee, S., Mapder, T., Ghosh, W., Chakraborty,  
325 R. (2020) Trends of mutation accumulation across global SARS-CoV-2 genomes:  
326 Implications for the evolution of the novel coronavirus. *Genomics* ,*112*, 5331-5342.

327 Schmelz, K., Bowles, S., (2021) Overcoming COVID-19 vaccination resistance when  
328 alternative policies affect the dynamics of conformism, social norms, and crowding  
329 out. *Proc Natl Acad Sci U S A* ,*118*, e2104912118.

330 Smith, N.G., Eyre-Walker, A., (2002) Adaptive protein evolution in *Drosophila*.  
331 *Nature*, *415*, 1022–1024.

332 Tajima, F. (1989) Statistical method for testing the neutral mutation hypothesis by  
333 DNA polymorphism. *Genetics*, *123*, 585–595.

334 Yeh, T.Y., Contreras, G.P. (2020) Emerging viral mutants in Australia suggest RNA  
335 recombination event in the SARS-CoV-2 genome. *Med J Aust* ,*213*, 44-44.e1.

336 Yeh, T.Y., Contreras, G.P. (2021) Viral transmission and evolution dynamics of SARS-  
337 CoV-2 in shipboard quarantine. *Bull World Health Organ.*, *99*, 486–495.

338 Zeng, K., Fu, Y.X., Shi, S., Wu, C.I. (2006) Statistical tests for detecting positive  
339 selection by utilizing high-frequency variants. *Genetics*, *174*, 1431-1439.

340

341 **Figure Legend**

342 Figure 1. Correlation between full vaccinated rate

343 (<https://ourworldindata.org/covid-vaccinations>) and mutation frequency ( $Mf$ ) of  
344 the full genome (A) or the spike gene (B) of SARS-CoV-2 delta variants from June 20  
345 to July 3 2021 in 20 countries: Australia (AUS), France (FRA), Germany (GER),  
346 Indonesia (IDA), India (IND), Ireland (IRL), Israel (ISR), Italy (ITA), Japan (JPN),  
347 Mexico (MEX), Netherland (NED), Norway (NOR), Portugal (POR), Singapore (SGP),  
348 Spain (ESP), Switzerland (SUI), Sweden (SWE), Turkey (TUR), United States (USA),  
349 and UK. Logarithmic regression (solid) line was draw based on 16 countries (pink)  
350 with a calculated 95% confidence interval (dashed lines). Japan, Switzerland, USA,  
351 and Australia are labeled in different colors as outliers.

352 Figure 2. Correlation between full vaccinated rate and  $D$  ratio ( $D_{\text{nonsyn}} / D_{\text{syn}}$ ) of the  
353 spike gene of SARS-CoV-2 delta variants. Exponential regression (solid) line was  
354 draw based on 19 countries (pink square) with a calculated 95% confidence interval  
355 (dashed lines). Australia (AUS) is labeled as outliers.

356



357 Figure 1.

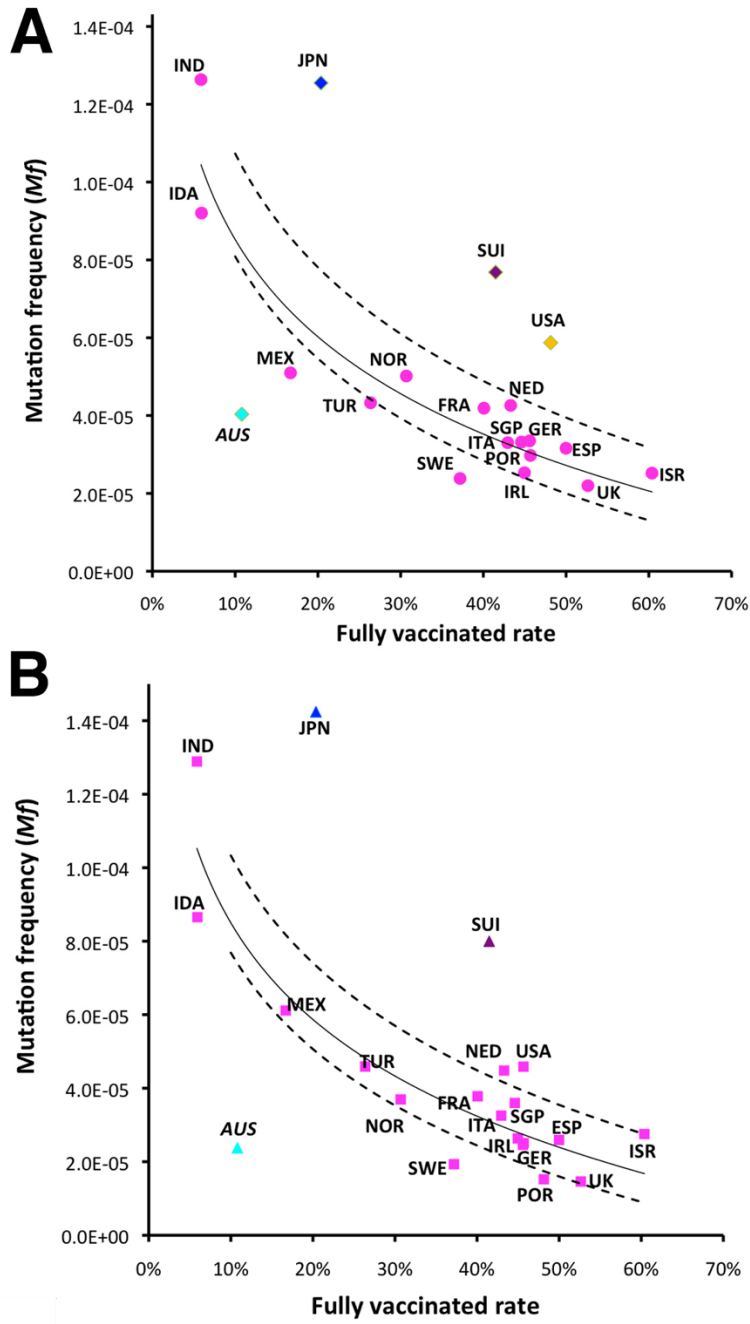

358

359

360 Figure 2.  
361

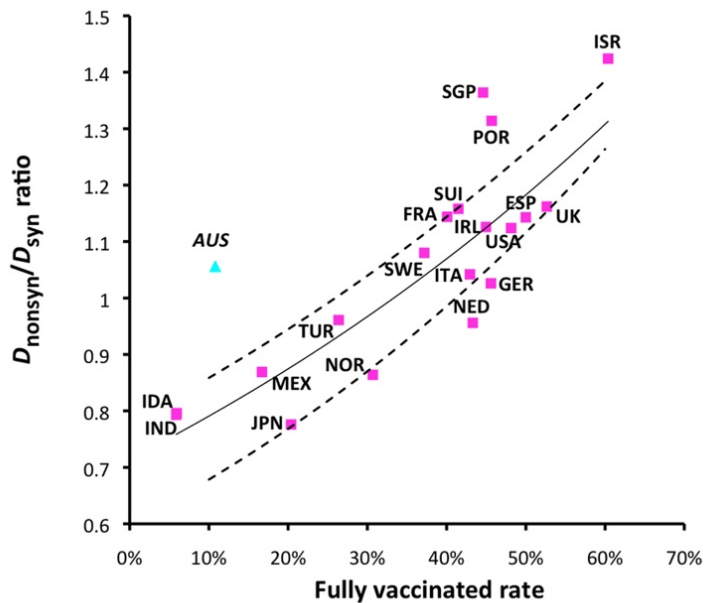

362  
363

364

365 Table 1. Neutrality analysis of SARS-CoV-2 delta variants of the full genome and the viral spike gene  
 366 from June 20 to July 3, 2021 in 20 countries. The statistical significance was estimated using 10,000  
 367 coalescent simulations in DNASP6. Not significant values ( $P>0.05$ ) are indicated in italic.  
 368

| Country     | Tajima's <i>D</i> | <i>DH</i>     | Zeng's <i>E</i> | <i>DH</i>     | Zeng's <i>E</i> | Tajima's <i>D</i> | $\Delta D$<br>( $D_{\text{Nonsyn}} - D_{\text{Syn}}$ ) | <i>D</i> ratio<br>( $D_{\text{Nonsyn}} / D_{\text{Syn}}$ ) | Ka /Ks | Neutrality index |
|-------------|-------------------|---------------|-----------------|---------------|-----------------|-------------------|--------------------------------------------------------|------------------------------------------------------------|--------|------------------|
| Israel      | -2.401            | -2.539        | <i>-0.040</i>   | -4.468        | 1.792           | -2.065            | 0.611                                                  | 1.424                                                      | 0.055  | 13.209           |
| France      | -2.518            | -2.482        | <i>-0.278</i>   | -2.973        | <i>0.176</i>    | -2.482            | 0.307                                                  | 1.144                                                      | 0.055  | 15.612           |
| Germany     | -2.800            | -2.703        | <i>-0.370</i>   | -3.831        | <i>0.655</i>    | -2.661            | 0.065                                                  | 1.026                                                      | 0.034  | 10.938           |
| Portugal    | -2.645            | -2.269        | <i>-0.558</i>   | -3.16         | <i>0.402</i>    | -2.395            | 0.593                                                  | 1.314                                                      | 0.058  | 8.393            |
| Spain       | -2.660            | -2.61         | <i>-0.283</i>   | <i>-1.606</i> | <i>-0.943</i>   | -2.530            | 0.306                                                  | 1.143                                                      | 0.065  | 12.986           |
| Australia   | -2.578            | -1.914        | <i>-0.626</i>   | <i>-1.949</i> | <i>-0.078</i>   | -2.064            | 0.091                                                  | 1.056                                                      | 0.052  | 10.609           |
| USA         | -2.657            | -2.207        | <i>-0.594</i>   | -4.551        | 1.306           | -2.580            | 0.290                                                  | 1.124                                                      | 0.015  | 14.467           |
| Ireland     | -2.833            | -2.069        | <i>-0.868</i>   | -2.337        | <i>-0.464</i>   | -2.659            | 0.289                                                  | 1.126                                                      | 0.055  | 12.385           |
| Italy       | -2.533            | -2.341        | <i>-0.388</i>   | -3.691        | <i>0.73</i>     | -2.51             | 0.095                                                  | 1.042                                                      | 0.045  | 17.699           |
| Turkey      | -2.451            | -2.638        | <i>-0.252</i>   | -3.748        | <i>0.916</i>    | -2.398            | -0.09                                                  | 0.961                                                      | 0.044  | 16.292           |
| Indonesia   | -2.339            | -2.116        | <i>-0.211</i>   | <i>-1.35</i>  | <i>-0.342</i>   | -1.773            | -0.381                                                 | 0.796                                                      | 0.055  | 11.236           |
| Japan       | -2.523            | -1.801        | <i>-0.675</i>   | -3.697        | 1.095           | -2.459            | -0.582                                                 | 0.776                                                      | 0.052  | 5.068            |
| Mexico      | -2.522            | -2.532        | <i>-0.166</i>   | -3.111        | <i>0.444</i>    | -2.405            | -0.307                                                 | 0.869                                                      | 0.073  | 11.340           |
| Norway      | <i>-1.566</i>     | <i>-1.177</i> | <i>-0.370</i>   | <i>-0.682</i> | <i>-0.732</i>   | <i>-1.562</i>     | 0.359                                                  | 1.307                                                      | 0.054  | 9.059            |
| Switzerland | -2.560            | -2.319        | <i>-0.279</i>   | -4.591        | 1.756           | -2.494            | 0.333                                                  | 1.158                                                      | 0.045  | 10.81            |
| Sweden      | -2.473            | -2.295        | <i>-0.383</i>   | -4.275        | 1.101           | -2.565            | 0.182                                                  | 1.08                                                       | 0.021  | 11.19            |
| Netherlands | -2.372            | -2.327        | <i>-0.231</i>   | -3.811        | <i>0.893</i>    | -2.48             | -0.107                                                 | 0.956                                                      | 0.049  | 10.64            |
| Singapore   | -2.199            | -2.791        | <i>0.482</i>    | -2.538        | <i>0.507</i>    | -1.909            | 0.500                                                  | 1.364                                                      | 0.053  | 9.059            |
| India       | -2.878            | -2.470        | <i>-0.469</i>   | -3.961        | <i>0.884</i>    | -2.826            | -0.073                                                 | 0.793                                                      | 0.051  | 7.102            |
| UK          | -2.748            | -2.546        | <i>-0.540</i>   | -3.299        | <i>0.168</i>    | -2.663            | 0.355                                                  | 1.162                                                      | 0.013  | 32.537           |

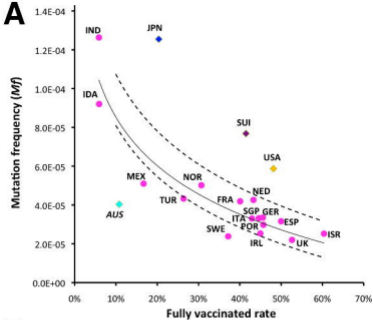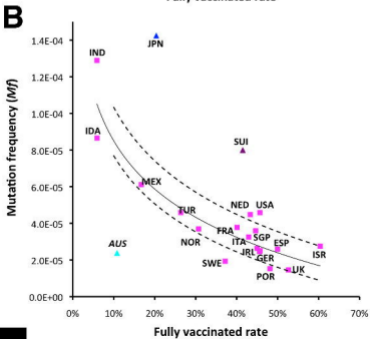

$D_{\text{nonsyn}}/D_{\text{syn}}$  ratio

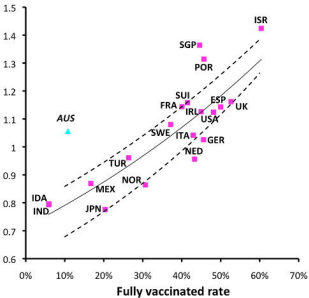

Table 1. Neutrality analysis of SARS-CoV-2 delta variants of the full genome and the viral spike gene from June 20 to July 3, 2021 in 20 countries. The statistic significance was estimated using 10,000 coalescent simulations in DNASP6. Not significant values ( $P>0.05$ ) are indicated in italic.

| Country     | Full genome       |               |                 | Spike gene    |                 |                   |                                                        |                                                            |        |                  |
|-------------|-------------------|---------------|-----------------|---------------|-----------------|-------------------|--------------------------------------------------------|------------------------------------------------------------|--------|------------------|
|             | Tajima's <i>D</i> | <i>DH</i>     | Zeng's <i>E</i> | <i>DH</i>     | Zeng's <i>E</i> | Tajima's <i>D</i> | $\Delta D$<br>( $D_{\text{Nonsyn}} - D_{\text{Syn}}$ ) | <i>D</i> ratio<br>( $D_{\text{Nonsyn}} / D_{\text{Syn}}$ ) | Ka /Ks | Neutrality index |
| Israel      | -2.401            | -2.539        | <i>-0.040</i>   | -4.468        | <i>1.792</i>    | -2.065            | 0.611                                                  | 1.424                                                      | 0.055  | 13.209           |
| France      | -2.518            | -2.482        | <i>-0.278</i>   | -2.973        | <i>0.176</i>    | -2.482            | 0.307                                                  | 1.144                                                      | 0.055  | 15.612           |
| Germany     | -2.800            | -2.703        | <i>-0.370</i>   | -3.831        | <i>0.655</i>    | -2.661            | 0.065                                                  | 1.026                                                      | 0.034  | 10.938           |
| Portugal    | -2.645            | -2.269        | <i>-0.558</i>   | -3.16         | <i>0.402</i>    | -2.395            | 0.593                                                  | 1.314                                                      | 0.058  | 8.393            |
| Spain       | -2.660            | -2.61         | <i>-0.283</i>   | <i>-1.606</i> | <i>-0.943</i>   | -2.530            | 0.306                                                  | 1.143                                                      | 0.065  | 12.986           |
| Australia   | -2.578            | -1.914        | <i>-0.626</i>   | <i>-1.949</i> | <i>-0.078</i>   | -2.064            | 0.091                                                  | 1.056                                                      | 0.052  | 10.609           |
| USA         | -2.657            | -2.207        | <i>-0.594</i>   | -4.551        | <i>1.306</i>    | -2.580            | 0.290                                                  | 1.124                                                      | 0.015  | 14.467           |
| Ireland     | -2.833            | -2.069        | <i>-0.868</i>   | -2.337        | <i>-0.464</i>   | -2.659            | 0.289                                                  | 1.126                                                      | 0.055  | 12.385           |
| Italy       | -2.533            | -2.341        | <i>-0.388</i>   | -3.691        | <i>0.73</i>     | -2.51             | 0.095                                                  | 1.042                                                      | 0.045  | 17.699           |
| Turkey      | -2.451            | -2.638        | <i>-0.252</i>   | -3.748        | <i>0.916</i>    | -2.398            | -0.09                                                  | 0.961                                                      | 0.044  | 16.292           |
| Indonesia   | -2.339            | -2.116        | <i>-0.211</i>   | <i>-1.35</i>  | <i>-0.342</i>   | <i>-1.773</i>     | -0.381                                                 | 0.796                                                      | 0.055  | 11.236           |
| Japan       | -2.523            | -1.801        | <i>-0.675</i>   | -3.697        | <i>1.095</i>    | -2.459            | -0.582                                                 | 0.776                                                      | 0.052  | 5.068            |
| Mexico      | -2.522            | -2.532        | <i>-0.166</i>   | -3.111        | <i>0.444</i>    | -2.405            | -0.307                                                 | 0.869                                                      | 0.073  | 11.340           |
| Norway      | <i>-1.566</i>     | <i>-1.177</i> | <i>-0.370</i>   | <i>-0.682</i> | <i>-0.732</i>   | <i>-1.562</i>     | 0.359                                                  | 1.307                                                      | 0.054  | 9.059            |
| Switzerland | -2.560            | -2.319        | <i>-0.279</i>   | -4.591        | <i>1.756</i>    | -2.494            | 0.333                                                  | 1.158                                                      | 0.045  | 10.81            |
| Sweden      | -2.473            | -2.295        | <i>-0.383</i>   | -4.275        | <i>1.101</i>    | -2.565            | 0.182                                                  | 1.08                                                       | 0.021  | 11.19            |
| Netherlands | -2.372            | -2.327        | <i>-0.231</i>   | -3.811        | <i>0.893</i>    | -2.48             | -0.107                                                 | 0.956                                                      | 0.049  | 10.64            |
| Singapore   | -2.199            | -2.791        | <i>0.482</i>    | -2.538        | <i>0.507</i>    | -1.909            | 0.500                                                  | 1.364                                                      | 0.053  | 9.059            |
| India       | -2.878            | -2.470        | <i>-0.469</i>   | -3.961        | <i>0.884</i>    | -2.826            | -0.073                                                 | 0.793                                                      | 0.051  | 7.102            |
| UK          | -2.748            | -2.546        | <i>-0.540</i>   | -3.299        | <i>0.168</i>    | -2.663            | 0.355                                                  | 1.162                                                      | 0.013  | 32.537           |
